# Supplementary material
Source: Royal Society of Chemistry journal article supplement (https://www.rsc.org/suppdata/books/178801/9781788017183/bk9781788017183-180.pdf)
Supplement: Supplementary file 1 [file bk9781788017183-180.pdf]

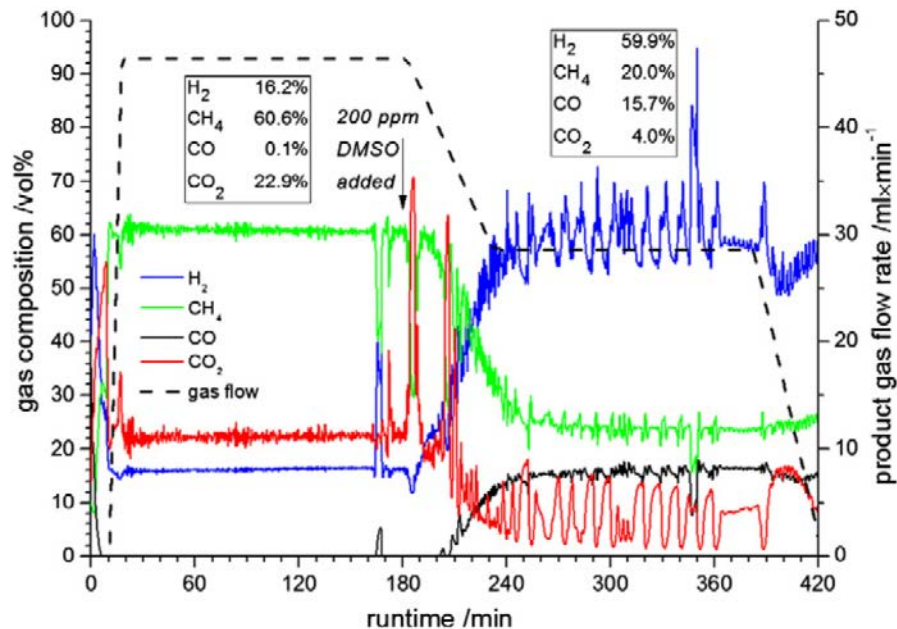

**Figure 7.7** . Flow rate and composition of product gas during the gasification of 7.5% ethanol in SCW (400 °C and 24.5 MPa). DMSO was added after 180 min and DI water was fed from 370 min onward. Reproduced from Ref. 50 with permission from Elsevier, Copyright 2004.
